# Supplementary material for: Challenges and Opportunities of Light-Emitting Diode (LED) as Key to Modulate Antioxidant Compounds in Plants. A Review
Source: PubMed Central journal article supplement (PMC7824119; doi:10.3390/antiox10010042), 2020-12-31
Supplement: antioxidants-10-00042-s001.pdf [file antioxidants-10-00042-s001.pdf]

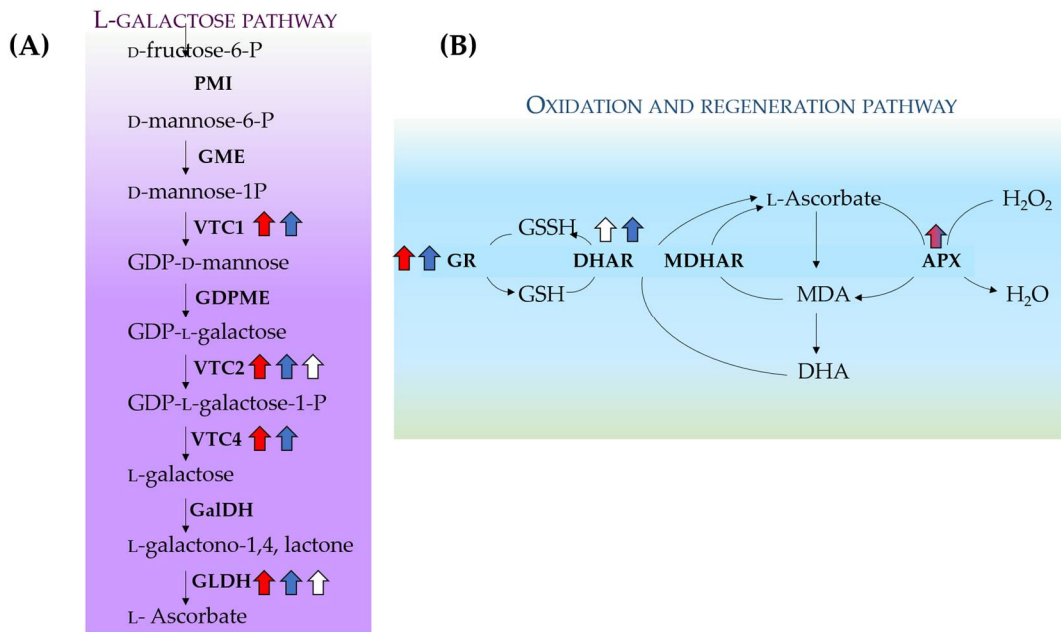

**Figure S1.** Schematic representation of **A)** the L-galactose pathway of vitamin C (L-ascorbate) biosynthesis and **B)** the Ascorbate-glutathione cycle. Arrows indicate up- or down-regulation by blue (↑), red (↑), or white (↑) LEDs. Adapted from the MetaCyc database (<https://biocyc.org/>). Phosphomannose isomerase (PMI), GDP-D-mannose 3',5' -epimerase (GME), GDP-D-mannose pyrophosphorylase (VTC1), GDP-mannose 3',5' -epimerase (GDPME), GDP-L-galactose phosphorylase (VTC2), l-galactose-1-phosphate phosphatase (VTC4), l-galactose dehydrogenase (GalDH), l-galactono-1,4-lactone dehydrogenase (GLDH), ascorbate peroxidase (APX), monodehydroascorbate reductase (MDHAR), dehydroascorbate reductase (DHAR), glutathione reductase (GR), monodehydroascorbate (MDA), dehydroascorbate (DHA), reduced glutathione (GSH), oxidized glutathione (GSSH).

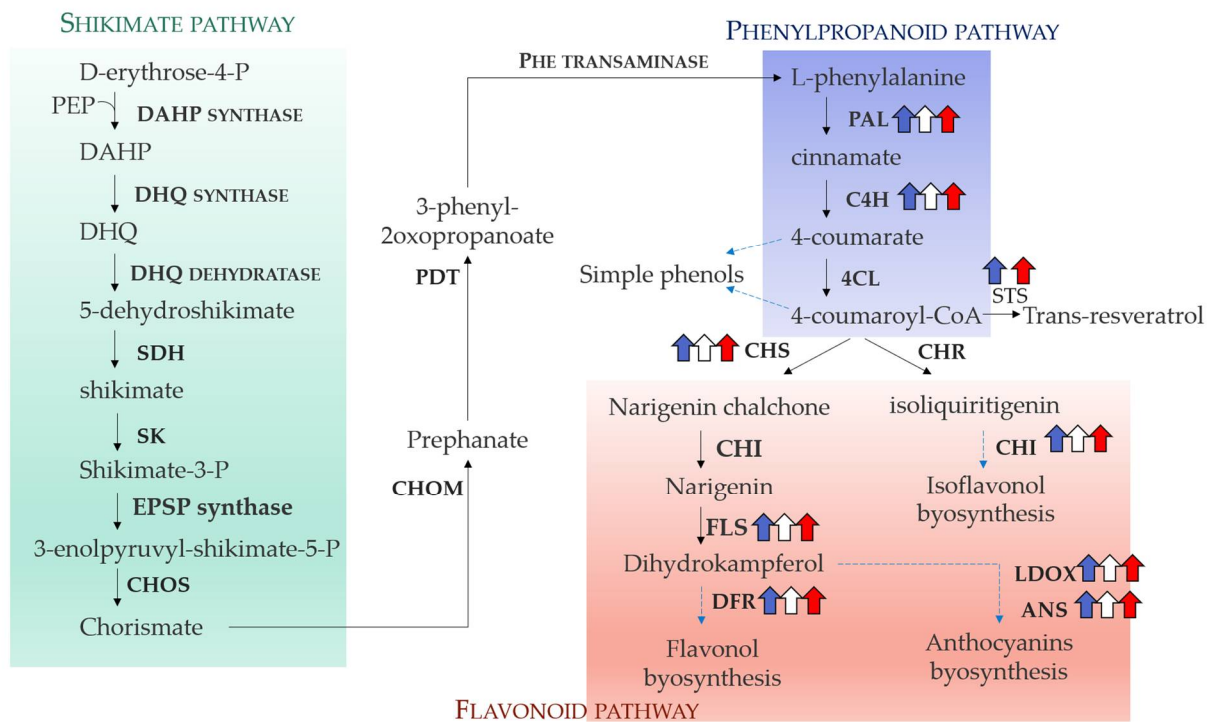

**Figure S2.** Schematic representation of the polyphenol biosynthetic pathway. Arrows indicate up- or down-regulation by blue (↑), red (↑), or white (↑) LEDs. Adapted from the MetaCyc database (<https://biocyc.org/>). Phosphoenolpyruvate (PEP), 3-deoxy-D-arabino-heptulosonate-7-phosphate (DHAP), 3-dehydroquinone (DHQ), 5-dehydroshikimate dehydrogenase (SDH), shikimate kinase (SK), 3-enolpyruvyl-shikimate-5-phosphate synthase (EPSP synthase), chorismate synthase (CHOS), chorismate mutase (CHOM), prephenate dehydratase (PDT), phenylalanine (PHE), phenylalanine ammonia lyase

(PAL), cinnamate 4-hydroxylase (C4H), 4-coumarate coenzyme A ligase (C4H), chalcone synthase (CHS), chalcone isomerase (CHI), flavonol synthase (FLS), leucoanthocyanidin dioxygenase (LDOX), dihydroflavonol 4-reductase (DFR), Anthocyanidin synthase (ANS), and stilbene synthase (STS).

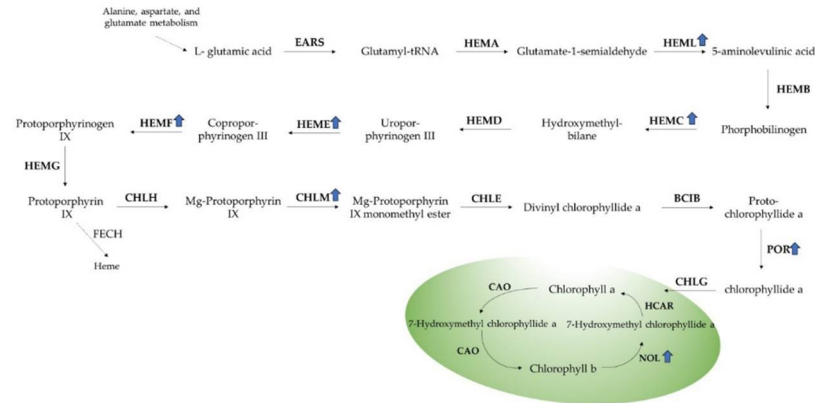

**Figure S3.** Schematic representation of the chlorophyll biosynthetic pathway. Arrows indicate up- or down-regulation by blue (↑), red (↓), or white (⬆) LEDs. Adapted from the MetaCyc database (<https://biocyc.org/>). Glutamyl-tRNA synthetase (EARS), glutamyl-tRNA reductase (HEMA), glutamate-1-semialdehyde 2,1-aminotransferase (HEML), 5-aminolevulinic acid dehydrogenase (HEMB), porphobilinogen deaminase (HEMC), uroporphyrinogen III synthase (HEMD), uroporphyrinogen III decarboxylase (HEME), coproporphyrinogen III oxidase (HEMF), protoporphyrinogen oxidase (HEMG), Mg-chelatase (CHLH), Mg-protoporphyrin IX methyltransferase (CHLM), magnesium-protoporphyrin IX monomethyl ester cyclase (CHLE), 3,8- divinyl protochlorophyllide a 8-vinyl-reductase (ferredoxin) (BCIB), Protochlorophyllide reductase (POR), chlorophyll a synthase (CHLG), protoporphyrin/coproporphyrin ferro chelatase (FECH), chlorophyllide a oxygenase (CAO), chlorophyll b reductase (NOL), 7-Hydroxymethyl chlorophyll a reductase (HCAR).

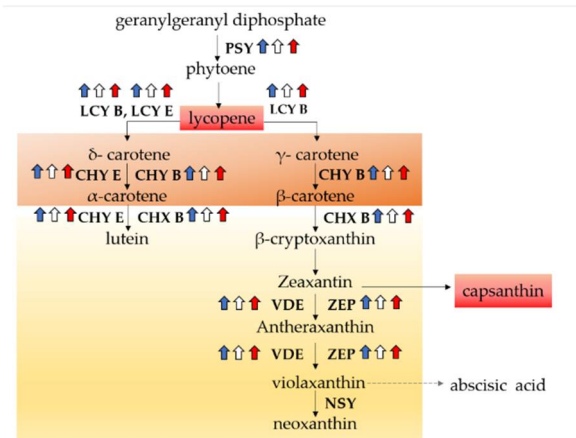

**Figure S4.** Schematic representation of the carotenoids biosynthetic pathway. Arrows indicate up- or down-regulation by blue (↑), red (↓), or white (⬆) LEDs. Adapted from the MetaCyc database (<https://biocyc.org/>). Phytoene synthase (PSY), lycopene β-ring cyclase (LCYB), lycopene ε-ring cyclase (LCYE), carotenoid β-ring hydroxylase (CHYB), carotenoid ε-ring hydroxylase (CHYE), zeaxanthin epoxidase (ZEP), violaxanthin de-epoxidase (VDE), neoxanthin synthase (NSY).

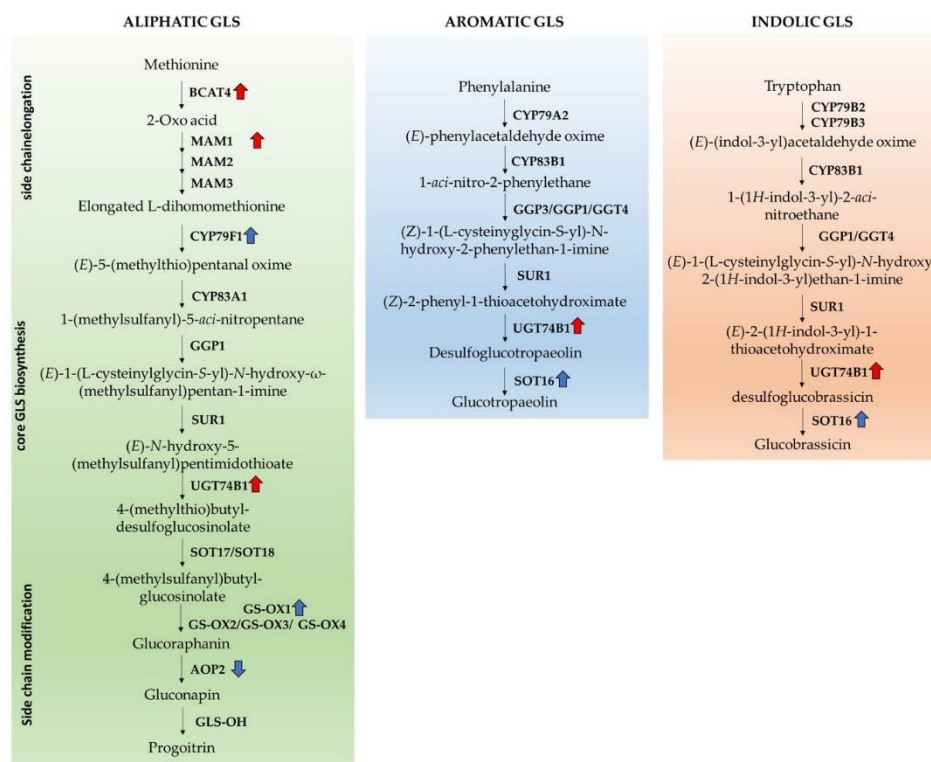

**Figure S5.** Schematic representation of the glucosinolates biosynthetic pathway. Arrows indicate up- or down-regulation by blue (↑), red (↓), or white (⬆) LEDs. Adapted from MetaCyc database (<https://biocyc.org/>). branched-chain aminotransferase (BCAT), methylthioalkylmalate synthase (MAM1), homomethionine monooxygenase (CYP79F1/F2), methylthiobutanaldoxime monooxygenase (CYP83A1), methylthiobutylhydroximoyl-glutathione gamma-glutamyl peptidase (GGP1), (E)-1-(glycylcystein-5-yl)-4-(methylthio)-butylhydroximate C-S lyase (SUR1), N-hydroxythioamide S- $\beta$ -glucosyltransferase (UGT74B1), 3-methylthiopropyl-desulfoglucosinolate sulfotransferase (SOT), omega-(methylthio)alkylglucosinolate S-oxygenase (GS-OX), glutathione-S conjugate gamma-glutamyl hydrolase (GGT4), UDP-glucose: 4-methylthiobutylhydroximate S-glucosyltransferase (UGT74B1), 3-(methylsulfonyl)propyl-glucosinolate dioxygenase (AOP2), 3-butenylglucosinolate 2-hydroxylase (GLS-OH).
